# Supplementary material
Source: PubMed Central journal article supplement (PMC4763755)
Supplement: pnas.1522675113.sd01.pdf [file pnas.1522675113.sd01.pdf]

## Supplementary Dataset S1

| Sample (a)          | Integration Site (b) |           |     |        | Breakpoint |          | Nearest Gene (c)             |              |           |        |           |           |
|---------------------|----------------------|-----------|-----|--------|------------|----------|------------------------------|--------------|-----------|--------|-----------|-----------|
|                     | chr                  | Site      | LTR | Strand | Site       | Distance | Intron/Exon/<br>Distance (d) | Reference ID | Name      | Strand | TxStart   | TxEnd     |
| Patient Tumor 06/13 | chr1                 | 25504500  | 3'  | +      | 25504741   | 241      | 44266                        | NM_015484    | SYF2      | -      | 25548766  | 25559013  |
| Patient Tumor 06/13 | chr14                | 39760983  | 3'  | -      | 39760959   | 24       | Intron                       | NM_203356    | CTAGE5    | +      | 39735501  | 39820397  |
| Patient Tumor 06/13 | chr2                 | 231194355 | 3'  | -      | 231194276  | 79       | Intron                       | NM_138402    | SP140L    | +      | 231191893 | 231268445 |
| Patient Tumor 06/13 | chr21                | 47990522  | 3'  | +      | 47990653   | 131      | 14090                        | NM_001146116 | DIP2A     | +      | 47878861  | 47976432  |
| Patient Tumor 06/13 | chr22                | 39482729  | 3'  | -      | 39482589   | 140      | Intron                       | NM_021822    | APOBEC3G  | +      | 39473009  | 39483748  |
| Patient Tumor 06/13 | chr3                 | 69106624  | 3'  | +      | 69106714   | 90       | Intron                       | NM_003968    | UBA3      | -      | 69103880  | 69129524  |
| Patient Tumor 06/13 | chr3                 | 153977380 | 3'  | -      | 153977360  | 20       | 1764                         | NM_015595    | ARHGEF26  | +      | 153839148 | 153975616 |
| Patient Tumor 06/13 | chr5                 | 156589743 | 3'  | +      | 156589815  | 72       | exon                         | NM_130899    | FAM71B    | -      | 156589343 | 156593279 |
| Patient Tumor 06/13 | chr9                 | 132689272 | 3'  | +      | 132689371  | 99       | Intron                       | NM_015033    | FNBP1     | -      | 132649465 | 132805473 |
| Patient Tumor 06/13 | UNK (e)              | 140148    | 3'  | -      | 140072     | 76       | 21368                        | NR_046235    | RNA45S5   | +      | 132597695 | 132644107 |
| Patient Tumor 06/13 | chrX                 | 13041037  | 3'  | -      | 13040914   | 123      | 12698                        | NM_174901    | FAM9C     | -      | 13053735  | 13062917  |
| Patient Tumor 06/13 | chrX                 | 13041037  | 3'  | -      | 13040948   | 89       | 12698                        | NM_174901    | FAM9C     | -      | 13053735  | 13062917  |
| Patient Tumor 06/13 | chrX                 | 41745471  | 3'  | +      | 41745597   | 126      | Intron                       | NM_001126054 | CASK      | -      | 41374188  | 41782287  |
| Patient Tumor 06/13 | chr1                 | 40664951  | 5'  | +      | 40665053   | 102      | Intron                       | NM_012421    | RLF       | +      | 40627040  | 40706593  |
| Patient Tumor 06/13 | chr1                 | 83095569  | 5'  | +      | 83095635   | 66       | 637462                       | NM_012302    | LPHN2     | +      | 82266081  | 82458107  |
| Patient Tumor 06/13 | chr1                 | 204763731 | 5'  | -      | 204763527  | 204      | 34050                        | NM_001160333 | NFASC     | +      | 204797781 | 204991950 |
| Patient Tumor 06/13 | chr1                 | 220277733 | 5'  | +      | 220277988  | 255      | Intron                       | NM_018060    | IARS2     | +      | 220267454 | 220321383 |
| Patient Tumor 06/13 | chr10                | 85703395  | 5'  | +      | 85703498   | 103      | 195789                       | NM_014394    | GHITM     | +      | 85899184  | 85913311  |
| Patient Tumor 06/13 | chr10                | 91627165  | 5'  | +      | 91627467   | 302      | 26547                        | NR_038382    | LOC643529 | +      | 91589249  | 91600618  |
| Patient Tumor 06/13 | chr10                | 116345550 | 5'  | +      | 116345910  | 360      | Intron                       | NM_006720    | ABLIM1    | -      | 116190866 | 116444414 |
| Patient Tumor 06/13 | chr10                | 134262955 | 5'  | +      | 134263036  | 81       | 1130                         | NM_173541    | C10orf91  | +      | 134258713 | 134261825 |
| Patient Tumor 06/13 | chr11                | 64644147  | 5'  | -      | 64643969   | 178      | Intron                       | NM_006795    | EHD1      | -      | 64620207  | 64646191  |
| Patient Tumor 06/13 | chr11                | 126305382 | 5'  | -      | 126305319  | 63       | Intron                       | NM_032531    | KIRREL3   | -      | 126293395 | 126870766 |
| Patient Tumor 06/13 | chr12                | 98431782  | 5'  | -      | 98431737   | 45       | 42556                        | NR_036189    | MIR4303   | -      | 98389160  | 98389226  |
| Patient Tumor 06/13 | chr13                | 72610300  | 5'  | +      | 72610428   | 128      | 168970                       | NM_004392    | DACH1     | -      | 72012097  | 72441330  |
| Patient Tumor 06/13 | chr13                | 79189354  | 5'  | -      | 79189355   | 99       | 4866                         | NM_024546    | RNF219    | -      | 79188420  | 79233314  |
| Patient Tumor 06/13 | chr13                | 100017923 | 5'  | +      | 100017958  | 35       | Intron                       | NR_039765    | MIR548AN  | -      | 99868261  | 100058554 |
| Patient Tumor 06/13 | chr15                | 62305220  | 5'  | +      | 62305385   | 165      | Intron                       | NM_017684    | VPS13C    | -      | 62144589  | 62352664  |
| Patient Tumor 06/13 | chr15                | 62305220  | 5'  | +      | 62305306   | 86       | Intron                       | NM_017684    | VPS13C    | -      | 62144589  | 62352664  |
| Patient Tumor 06/13 | chr15                | 62305220  | 5'  | +      | 62305268   | 48       | Intron                       | NM_017684    | VPS13C    | -      | 62144589  | 62352664  |
| Patient Tumor 06/13 | chr15                | 66070410  | 5'  | -      | 66070199   | 211      | Intron                       | NM_001144823 | DENND4A   | -      | 65952956  | 66084631  |
| Patient Tumor 06/13 | chr16                | 4549264   | 5'  | -      | 4549206    | 58       | Intron                       | NM_001127206 | HMOX2     | +      | 4524718   | 4560348   |

Supplementary Dataset S1 (cont.)

| Sample (a)          | Integration Site (b) |           |     |        | Breakpoint |          | Nearest Gene (c)             |              |            |        |           |           |
|---------------------|----------------------|-----------|-----|--------|------------|----------|------------------------------|--------------|------------|--------|-----------|-----------|
|                     | chr                  | Site      | LTR | Strand | Site       | Distance | Intron/Exon/<br>Distance (d) | Reference ID | Name       | Strand | TxStart   | TxEnd     |
| Patient Tumor 06/13 | chr16                | 72876464  | 5'  | +      | 72876527   | 63       | Intron                       | NM_006885    | ZFX3       | -      | 72816785  | 73092534  |
| Patient Tumor 06/13 | chr17                | 73357756  | 5'  | -      | 73357553   | 203      | Intron                       | NM_002086    | GRB2       | -      | 73314156  | 73401790  |
| Patient Tumor 06/13 | chr18                | 45395268  | 5'  | -      | 45395091   | 177      | Intron                       | NM_001135937 | SMAD2      | -      | 45359465  | 45457512  |
| Patient Tumor 06/13 | chr18                | 49856439  | 5'  | +      | 49856463   | 24       | 10102                        | NM_005215    | DCC        | +      | 49866541  | 51062273  |
| Patient Tumor 06/13 | chr19                | 8367225   | 5'  | -      | 8366799    | 426      | exon                         | NM_016579    | CD320      | -      | 8367010   | 8373240   |
| Patient Tumor 06/13 | chr19                | 15523958  | 5'  | -      | 15523886   | 72       | Intron                       | NM_014371    | AKAP9L     | -      | 15490858  | 15529833  |
| Patient Tumor 06/13 | chr19                | 47268280  | 5'  | +      | 47268409   | 129      | 6448                         | NM_024301    | FKRP       | +      | 47249302  | 47261832  |
| Patient Tumor 06/13 | chr2                 | 32318738  | 5'  | +      | 32318811   | 73       | Intron                       | NM_014946    | SPAST      | +      | 32288679  | 32382706  |
| Patient Tumor 06/13 | chr2                 | 53864108  | 5'  | -      | 53864038   | 70       | 33008                        | NM_001201965 | ASB3       | -      | 53897116  | 54014146  |
| Patient Tumor 06/13 | chr2                 | 70326855  | 5'  | -      | 70326764   | 91       | 10521                        | NM_006196    | PCBP1      | +      | 70314584  | 70316334  |
| Patient Tumor 06/13 | chr2                 | 134529427 | 5'  | +      | 134529521  | 94       | 203986                       | NM_207481    | NCKAP5     | -      | 133429371 | 134326031 |
| Patient Tumor 06/13 | chr20                | 38497950  | 5'  | -      | 38497881   | 69       | 644559                       | NR_027124    | LOC339568  | -      | 37842423  | 37853391  |
| Patient Tumor 06/13 | chr21                | 36190940  | 5'  | +      | 36190991   | 51       | Intron                       | NM_001754    | RUNX1      | -      | 36160097  | 36209987  |
| Patient Tumor 06/13 | chr21                | 47990527  | 5'  | -      | 47990198   | 329      | 14095                        | NM_001146116 | DIP2A      | +      | 47878861  | 47976432  |
| Patient Tumor 06/13 | chr22                | 43600178  | 5'  | -      | 43600120   | 58       | Intron                       | NM_173050    | SCUBE1     | -      | 43599228  | 43739394  |
| Patient Tumor 06/13 | chr22                | 49888230  | 5'  | -      | 49887975   | 255      | 125059                       | NR_026997    | C22orf34   | -      | 50013289  | 50051190  |
| Patient Tumor 06/13 | chr3                 | 36434781  | 5'  | +      | 36434858   | 77       | Intron                       | NM_003149    | STAC       | +      | 36422096  | 36589496  |
| Patient Tumor 06/13 | chr4                 | 89895958  | 5'  | -      | 89895888   | 70       | 138009                       | NM_145715    | TIGD2      | +      | 90033967  | 90036052  |
| Patient Tumor 06/13 | chr4                 | 96160049  | 5'  | +      | 96160107   | 58       | Intron                       | NM_003728    | UNC5C      | -      | 96083655  | 96470361  |
| Patient Tumor 06/13 | chr4                 | 143123675 | 5'  | -      | 143123517  | 158      | Intron                       | NM_001101689 | INPP4B     | -      | 142949181 | 143787804 |
| Patient Tumor 06/13 | chr4                 | 180821037 | 5'  | -      | 180820920  | 117      | 1164205                      | NR_033918    | NCRNA00290 | -      | 181985242 | 182080302 |
| Patient Tumor 06/13 | chr4                 | 188362725 | 5'  | -      | 188362570  | 155      | Intron                       | NR_038931    | LOC339975  | -      | 188225236 | 188426767 |
| Patient Tumor 06/13 | chr5                 | 82592099  | 5'  | +      | 82592208   | 109      | Intron                       | NM_022550    | XRCC4      | +      | 82373316  | 82649579  |
| Patient Tumor 06/13 | chr6                 | 90882203  | 5'  | +      | 90882278   | 75       | Intron                       | NM_021813    | BACH2      | -      | 90636246  | 91006627  |
| Patient Tumor 06/13 | chr8                 | 50648093  | 5'  | -      | 50647956   | 137      | 176503                       | NM_018967    | SNTG1      | +      | 50824596  | 51705427  |
| Patient Tumor 06/13 | chr8                 | 64918110  | 5'  | +      | 64918254   | 144      | 220056                       | NR_038875    | LOC286184  | +      | 64681987  | 64698054  |
| Patient Tumor 06/13 | chr8                 | 81076395  | 5'  | -      | 81076371   | 24       | 83385                        | NM_005079    | TPD52      | -      | 80947104  | 80993010  |
| Patient Tumor 06/13 | chr9                 | 73311794  | 5'  | -      | 73311597   | 197      | Intron                       | NM_208945    | TRPM3      | -      | 73149965  | 73483974  |
| Patient Tumor 06/13 | chr9                 | 132613310 | 5'  | -      | 132613165  | 145      | Intron                       | NM_006676    | USP20      | +      | 132597895 | 132644107 |
| Patient Tumor 06/13 | UNK                  | 140143    | 5'  | +      | 140392     | 249      | 21368                        | NR_046235    | RNA45S5    | -      | 132589563 | 132597572 |
| Patient Tumor 06/13 | UNK                  | 8306      | 5'  | +      | 8529       | 223      | 0                            | NA           | NA         | -      | 132589563 | 132597572 |
| Patient Tumor 06/13 | UNK                  | 8306      | 5'  | +      | 8492       | 186      | 0                            | NA           | NA         | -      | 132589563 | 132597572 |

## Supplementary Dataset S1 (cont.)

| Sample (a)          | Integration Site (b) |           |     |        | Breakpoint |          | Nearest Gene (c)             |              |              |        |           |           |
|---------------------|----------------------|-----------|-----|--------|------------|----------|------------------------------|--------------|--------------|--------|-----------|-----------|
|                     | chr                  | Site      | LTR | Strand | Site       | Distance | Intron/Exon/<br>Distance (d) | Reference ID | Name         | Strand | TxStart   | TxEnd     |
| Patient Tumor 06/13 | UNK                  | 8306      | 5'  | +      | 8459       | 153      | 0                            | NA           | NA           | -      | 132589563 | 132597572 |
| Patient Tumor 06/13 | UNK                  | 8306      | 5'  | +      | 8435       | 129      | 0                            | NA           | NA           | -      | 132589563 | 132597572 |
| Patient Tumor 06/13 | chrX                 | 13041032  | 5'  | +      | 13041117   | 85       | 12703                        | NM_174901    | FAM9C        | -      | 13053735  | 13062917  |
| Patient PBMC 04/08  | chr1                 | 17702850  | 3'  | +      | 17702886   | 36       | Intron                       | NM_207421    | PADI6        | +      | 17698740  | 17728195  |
| Patient PBMC 04/08  | chr1                 | 52956520  | 3'  | +      | 52956574   | 54       | Intron                       | NM_015269    | ZCCHC11      | -      | 52888947  | 53018762  |
| Patient PBMC 04/08  | chr1                 | 111197105 | 3'  | -      | 111196896  | 209      | 17204                        | NM_002232    | KCNA3        | -      | 111214309 | 111217655 |
| Patient PBMC 04/08  | chr1                 | 111714564 | 3'  | +      | 111714695  | 131      | Intron                       | NM_001007794 | CEPT1        | +      | 111682248 | 111727724 |
| Patient PBMC 04/08  | chr1                 | 150057641 | 3'  | +      | 150057689  | 48       | Intron                       | NM_007259    | VPS45        | +      | 150039341 | 150117505 |
| Patient PBMC 04/08  | chr1                 | 151387473 | 3'  | -      | 151387216  | 257      | Intron                       | NM_207171    | POGZ         | -      | 151375199 | 151431941 |
| Patient PBMC 04/08  | chr1                 | 172318825 | 3'  | -      | 172318765  | 60       | Intron                       | NM_015569    | DNM3         | +      | 171810620 | 172381857 |
| Patient PBMC 04/08  | chr1                 | 198506789 | 3'  | -      | 198506603  | 186      | Intron                       | NM_133262    | ATP6V1G3     | -      | 198492351 | 198510075 |
| Patient PBMC 04/08  | chr1                 | 198506789 | 3'  | -      | 198506633  | 156      | Intron                       | NM_133262    | ATP6V1G3     | -      | 198492351 | 198510075 |
| Patient PBMC 04/08  | chr1                 | 198506789 | 3'  | -      | 198506732  | 57       | Intron                       | NM_133262    | ATP6V1G3     | -      | 198492351 | 198510075 |
| Patient PBMC 04/08  | chr1                 | 236003221 | 3'  | -      | 236003162  | 59       | Intron                       | NM_000081    | LYST         | -      | 235824344 | 236030220 |
| Patient PBMC 04/08  | chr1                 | 236003221 | 3'  | -      | 236003176  | 45       | Intron                       | NM_000081    | LYST         | -      | 235824344 | 236030220 |
| Patient PBMC 04/08  | chr1                 | 236003221 | 3'  | -      | 236003197  | 24       | Intron                       | NM_000081    | LYST         | -      | 235824344 | 236030220 |
| Patient PBMC 04/08  | chr11                | 1311385   | 3'  | +      | 1311541    | 156      | Intron                       | NM_019009    | TOLLIP       | -      | 1295597   | 1330892   |
| Patient PBMC 04/08  | chr11                | 1311385   | 3'  | +      | 1311458    | 73       | Intron                       | NM_019009    | TOLLIP       | -      | 1295597   | 1330892   |
| Patient PBMC 04/08  | chr12                | 124080558 | 3'  | -      | 124080423  | 135      | Intron                       | NM_006815    | TMED2        | +      | 124069075 | 124082688 |
| Patient PBMC 04/08  | chr12                | 124080558 | 3'  | -      | 124080488  | 72       | Intron                       | NM_006815    | TMED2        | +      | 124069075 | 124082688 |
| Patient PBMC 04/08  | chr13                | 108927255 | 3'  | +      | 108927349  | 94       | Intron                       | NM_001145645 | TNFSF13B     | +      | 108921976 | 108960832 |
| Patient PBMC 04/08  | chr13                | 108927255 | 3'  | +      | 108927312  | 57       | Intron                       | NM_001145645 | TNFSF13B     | +      | 108921976 | 108960832 |
| Patient PBMC 04/08  | chr14                | 70206617  | 3'  | +      | 70206715   | 98       | 24382                        | NR_029378    | LOC100289511 | -      | 70232999  | 70234430  |
| Patient PBMC 04/08  | chr15                | 44962782  | 3'  | -      | 44962703   | 79       | Intron                       | NM_001145112 | PATL2        | -      | 44957929  | 44969086  |
| Patient PBMC 04/08  | chr16                | 2308799   | 3'  | -      | 2308725    | 74       | Intron                       | NM_006711    | RNPS1        | -      | 2303099   | 2318413   |
| Patient PBMC 04/08  | chr16                | 28582441  | 3'  | +      | 28582485   | 44       | Intron                       | NM_138414    | CCDC101      | +      | 28565248  | 28603111  |
| Patient PBMC 04/08  | chr16                | 68133605  | 3'  | -      | 68133498   | 107      | Intron                       | NM_173163    | NFATC3       | +      | 68119268  | 68263162  |
| Patient PBMC 04/08  | chr16                | 68133605  | 3'  | -      | 68133537   | 68       | Intron                       | NM_173163    | NFATC3       | +      | 68119268  | 68263162  |
| Patient PBMC 04/08  | chr17                | 5239665   | 3'  | +      | 5239693    | 28       | Intron                       | NM_001083585 | RABEP1       | +      | 5185557   | 5289132   |
| Patient PBMC 04/08  | chr17                | 27766731  | 3'  | +      | 27766888   | 157      | Intron                       | NM_020791    | TAOK1        | +      | 27717942  | 27878921  |
| Patient PBMC 04/08  | chr17                | 38753624  | 3'  | +      | 38753894   | 270      | 30351                        | NM_003079    | SMARCE1      | -      | 38783975  | 38804103  |
| Patient PBMC 04/08  | chr17                | 46483325  | 3'  | +      | 46483399   | 74       | Intron                       | NM_003726    | SKAP1        | -      | 46210801  | 46507594  |

## Supplementary Dataset S1 (cont.)

| Sample (a)         | chr   | Site      | LTR | Strand | Site      | Distance | Intron/Exon/<br>Distance (d) | Nearest Gene (c) |              |        |           |           |
|--------------------|-------|-----------|-----|--------|-----------|----------|------------------------------|------------------|--------------|--------|-----------|-----------|
|                    |       |           |     |        |           |          |                              | Reference ID     | Name         | Strand | TxStart   | TxEnd     |
| Patient PBMC 04/08 | chr17 | 65863078  | 3'  | -      | 65862924  | 154      | Intron                       | NM_004459        | BPTF         | +      | 65821779  | 65904494  |
| Patient PBMC 04/08 | chr17 | 79800929  | 3'  | +      | 79801094  | 165      | 104                          | NM_000918        | P4HB         | -      | 79801033  | 79818544  |
| Patient PBMC 04/08 | chr17 | 79800929  | 3'  | +      | 79801043  | 114      | 104                          | NM_000918        | P4HB         | -      | 79801033  | 79818544  |
| Patient PBMC 04/08 | chr18 | 44895083  | 3'  | +      | 44895135  | 52       | Intron                       | NM_016097        | IEF3IP1      | -      | 44881412  | 44702745  |
| Patient PBMC 04/08 | chr19 | 10317380  | 3'  | -      | 10317279  | 101      | 11625                        | NM_001379        | DNMT1        | -      | 10244021  | 10305755  |
| Patient PBMC 04/08 | chr19 | 37114133  | 3'  | -      | 37113831  | 302      | Intron                       | NM_032825        | ZNF382       | +      | 37096220  | 37119499  |
| Patient PBMC 04/08 | chr19 | 58267510  | 3'  | +      | 58267621  | 111      | exon                         | NM_173632        | ZNF776       | +      | 58258163  | 58269527  |
| Patient PBMC 04/08 | chr2  | 98449694  | 3'  | -      | 98449577  | 117      | Intron                       | NM_015348        | TMEM131      | -      | 98372800  | 98612354  |
| Patient PBMC 04/08 | chr2  | 160130185 | 3'  | +      | 160130312 | 127      | Intron                       | NM_001128213     | WDSUB1       | -      | 160092303 | 160143236 |
| Patient PBMC 04/08 | chr21 | 47191761  | 3'  | -      | 47191480  | 271      | 55993                        | NR_038876        | LOC100129027 | -      | 47247754  | 47256333  |
| Patient PBMC 04/08 | chr21 | 47990522  | 3'  | +      | 47990755  | 233      | 14090                        | NM_001146116     | DIP2A        | +      | 47878861  | 47976432  |
| Patient PBMC 04/08 | chr21 | 47990522  | 3'  | +      | 47990733  | 211      | 14090                        | NM_001146116     | DIP2A        | +      | 47878861  | 47976432  |
| Patient PBMC 04/08 | chr21 | 47990522  | 3'  | +      | 47990703  | 181      | 14090                        | NM_001146116     | DIP2A        | +      | 47878861  | 47976432  |
| Patient PBMC 04/08 | chr21 | 47990522  | 3'  | +      | 47990582  | 60       | 14090                        | NM_001146116     | DIP2A        | +      | 47878861  | 47976432  |
| Patient PBMC 04/08 | chr21 | 47990522  | 3'  | +      | 47990579  | 57       | 14090                        | NM_001146116     | DIP2A        | +      | 47878861  | 47976432  |
| Patient PBMC 04/08 | chr22 | 41177512  | 3'  | -      | 41177200  | 312      | Intron                       | NM_006358        | SLC25A17     | -      | 41165638  | 41215392  |
| Patient PBMC 04/08 | chr22 | 42249639  | 3'  | -      | 42249542  | 97       | Intron                       | NM_004599        | SREBF2       | +      | 42229105  | 42302375  |
| Patient PBMC 04/08 | chr22 | 50255944  | 3'  | +      | 50256133  | 189      | Intron                       | NM_014838        | ZBED4        | +      | 50247496  | 50283726  |
| Patient PBMC 04/08 | chr22 | 50298649  | 3'  | -      | 50298541  | 108      | Intron                       | NM_024105        | ALG12        | -      | 50298853  | 50312106  |
| Patient PBMC 04/08 | chr22 | 50298649  | 3'  | -      | 50298550  | 99       | Intron                       | NM_024105        | ALG12        | -      | 50298853  | 50312106  |
| Patient PBMC 04/08 | chr3  | 48965866  | 3'  | -      | 48965533  | 333      | Intron                       | NM_006321        | ARIH2        | +      | 48956280  | 49022971  |
| Patient PBMC 04/08 | chr3  | 48965866  | 3'  | -      | 48965823  | 43       | Intron                       | NM_006321        | ARIH2        | +      | 48956280  | 49022971  |
| Patient PBMC 04/08 | chr3  | 48965866  | 3'  | -      | 48965826  | 40       | Intron                       | NM_006321        | ARIH2        | +      | 48956280  | 49022971  |
| Patient PBMC 04/08 | chr3  | 48965866  | 3'  | -      | 48965829  | 37       | Intron                       | NM_006321        | ARIH2        | +      | 48956280  | 49022971  |
| Patient PBMC 04/08 | chr3  | 51434782  | 3'  | -      | 51434748  | 34       | Intron                       | NM_001171904     | VPRBP        | -      | 51433297  | 51534018  |
| Patient PBMC 04/08 | chr3  | 153038908 | 3'  | -      | 153038617 | 291      | 152645                       | NM_002888        | RAP2B        | +      | 152880028 | 152886263 |
| Patient PBMC 04/08 | chr4  | 24550456  | 3'  | -      | 24550413  | 43       | Intron                       | NM_001358        | DHX15        | -      | 24529087  | 24586184  |
| Patient PBMC 04/08 | chr4  | 147393213 | 3'  | +      | 147393281 | 68       | Intron                       | NM_001029998     | SLC10A7      | -      | 147175136 | 147443123 |
| Patient PBMC 04/08 | chr5  | 94877080  | 3'  | +      | 94877106  | 26       | exon                         | NM_014639        | TTC37        | -      | 94799598  | 94890709  |
| Patient PBMC 04/08 | chr6  | 26129407  | 3'  | +      | 26129506  | 99       | 4489                         | NM_003512        | HIST1H2AC    | +      | 26124372  | 26124918  |
| Patient PBMC 04/08 | chr7  | 139756502 | 3'  | +      | 139756529 | 27       | Intron                       | NM_022750        | PARP12       | -      | 139723548 | 139763521 |
| Patient PBMC 04/08 | chr7  | 150318109 | 3'  | +      | 150318329 | 220      | 4354                         | NR_024115        | GIMAP6       | -      | 150322463 | 150329680 |

## Supplementary Dataset S1 (cont.)

| Sample (a)         | Integration Site (b) |           |     |        | Breakpoint |          | Nearest Gene (c)             |              |              |        |           |           |
|--------------------|----------------------|-----------|-----|--------|------------|----------|------------------------------|--------------|--------------|--------|-----------|-----------|
|                    | chr                  | Site      | LTR | Strand | Site       | Distance | Intron/Exon/<br>Distance (d) | Reference ID | Name         | Strand | TxStart   | TxEnd     |
| Patient PBMC 04/08 | chr7                 | 150318109 | 3'  | +      | 150318204  | 95       | 4354                         | NR_024115    | GIMAP6       | -      | 150322463 | 150329680 |
| Patient PBMC 04/08 | chr7                 | 150318109 | 3'  | +      | 150318151  | 42       | 4354                         | NR_024115    | GIMAP6       | -      | 150322463 | 150329680 |
| Patient PBMC 04/08 | chr8                 | 126012090 | 3'  | +      | 126012268  | 178      | Intron                       | NM_003129    | SOLE         | +      | 126010719 | 126034525 |
| Patient PBMC 04/08 | chr9                 | 78356755  | 3'  | -      | 78356735   | 20       | 18011                        | NR_031679    | MIR548H3     | -      | 78118511  | 78338744  |
| Patient PBMC 04/08 | chr9                 | 110250443 | 3'  | +      | 110251300  | 857      | exon                         | NM_004235    | KLF4         | -      | 110247132 | 110252047 |
| Patient PBMC 04/08 | chr9                 | 128560810 | 3'  | -      | 128560739  | 71       | Intron                       | NM_006195    | PBX3         | +      | 128509616 | 128729655 |
| Patient PBMC 04/08 | chr9                 | 132186452 | 3'  | -      | 132186350  | 102      | 64486                        | NR_038955    | LOC100506190 | +      | 132250938 | 132275965 |
| Patient PBMC 02/04 | chr1                 | 25303117  | 3'  | +      | 25303241   | 124      | 11616                        | NM_004350    | RUNX3        | -      | 25226001  | 25291501  |
| Patient PBMC 02/04 | chr1                 | 45282611  | 3'  | +      | 45282712   | 101      | 2810                         | NM_001136537 | BTBD19       | +      | 45274153  | 45279801  |
| Patient PBMC 02/04 | chr1                 | 529566520 | 3'  | +      | 52956618   | 98       | Intron                       | NM_015269    | ZCCHC11      | -      | 52888947  | 53018762  |
| Patient PBMC 02/04 | chr1                 | 151015406 | 3'  | +      | 151015587  | 181      | Intron                       | NM_138278    | BNIP1        | +      | 151009028 | 151020076 |
| Patient PBMC 02/04 | chr1                 | 198506789 | 3'  | -      | 198506638  | 151      | Intron                       | NM_133262    | ATP6V1G3     | -      | 198492351 | 198510075 |
| Patient PBMC 02/04 | chr1                 | 223984623 | 3'  | +      | 223984754  | 131      | 9537                         | NM_017982    | SUSD4        | -      | 223394160 | 223537544 |
| Patient PBMC 02/04 | chr1                 | 236003221 | 3'  | -      | 236003186  | 35       | Intron                       | NM_000081    | LYST         | -      | 235824344 | 236030220 |
| Patient PBMC 02/04 | chr11                | 63617661  | 3'  | -      | 63617399   | 262      | Intron                       | NM_001163296 | MARK2        | +      | 63606399  | 63678492  |
| Patient PBMC 02/04 | chr11                | 71744577  | 3'  | -      | 71744258   | 319      | Intron                       | NM_006185    | NUMA1        | -      | 71713910  | 71791573  |
| Patient PBMC 02/04 | chr11                | 116791966 | 3'  | -      | 116791207  | 159      | Intron                       | NM_025164    | SIK3         | -      | 116714117 | 116968993 |
| Patient PBMC 02/04 | chr11                | 119105544 | 3'  | -      | 119105482  | 62       | Intron                       | NM_005188    | CBL          | +      | 119078989 | 119178859 |
| Patient PBMC 02/04 | chr12                | 112031796 | 3'  | -      | 112031764  | 32       | Intron                       | NM_002973    | ATXN2        | -      | 111890017 | 112037480 |
| Patient PBMC 02/04 | chr12                | 124080558 | 3'  | -      | 124080401  | 157      | Intron                       | NM_006815    | TMED2        | +      | 124069075 | 124082688 |
| Patient PBMC 02/04 | chr12                | 124207864 | 3'  | +      | 124207949  | 85       | Intron                       | NM_012463    | ATP6V0A2     | +      | 124196864 | 124246301 |
| Patient PBMC 02/04 | chr14                | 23005013  | 3'  | -      | 23004985   | 28       | 28793                        | NM_001944    | DAD1         | -      | 23033806  | 23058143  |
| Patient PBMC 02/04 | chr14                | 64174664  | 3'  | +      | 64174730   | 66       | Intron                       | NM_030791    | SGPP1        | -      | 64150934  | 64194756  |
| Patient PBMC 02/04 | chr14                | 64174669  | 3'  | -      | 64174570   | 99       | Intron                       | NM_030791    | SGPP1        | -      | 64150934  | 64194756  |
| Patient PBMC 02/04 | chr15                | 43399689  | 3'  | +      | 43399776   | 87       | 1403                         | NM_174916    | UBR1         | -      | 43235097  | 43398286  |
| Patient PBMC 02/04 | chr15                | 44962782  | 3'  | -      | 44962637   | 145      | Intron                       | NM_001145112 | PATL2        | -      | 44857929  | 44969086  |
| Patient PBMC 02/04 | chr15                | 44962782  | 3'  | -      | 44962644   | 138      | Intron                       | NM_001145112 | PATL2        | -      | 44857929  | 44969086  |
| Patient PBMC 02/04 | chr16                | 3892030   | 3'  | +      | 3892059    | 29       | Intron                       | NM_004380    | CREBBP       | -      | 3775055   | 3930121   |
| Patient PBMC 02/04 | chr16                | 56952620  | 3'  | -      | 56952599   | 21       | 2858                         | NM_001126107 | SLC12A3      | +      | 56899118  | 56949762  |
| Patient PBMC 02/04 | chr17                | 7353706   | 3'  | +      | 7353833    | 127      | Intron                       | NM_000747    | CHRN3        | +      | 7348405   | 7360932   |
| Patient PBMC 02/04 | chr17                | 78734928  | 3'  | +      | 78735022   | 94       | Intron                       | NM_020761    | RPTOR        | +      | 78518624  | 78940173  |
| Patient PBMC 02/04 | chr17                | 79800929  | 3'  | +      | 79801112   | 183      | 104                          | NM_000918    | P4HB         | -      | 79801033  | 79818544  |

# Supplementary Dataset S1

| Sample (a)         | Integration Site (b) |           |     |        | Breakpoint |          | Nearest Gene (c)             |              |              |        |           |           |
|--------------------|----------------------|-----------|-----|--------|------------|----------|------------------------------|--------------|--------------|--------|-----------|-----------|
|                    | chr                  | Site      | LTR | Strand | Site       | Distance | Intron/Exon/<br>Distance (d) | Reference ID | Name         | Strand | TxStart   | TxEnd     |
| Patient PBMC 02/04 | chr19                | 1184955   | 3'  | +      | 1185051    | 96       | 10673                        | NM_001100122 | SGND2        | -      | 1107832   | 1174282   |
| Patient PBMC 02/04 | chr19                | 10554102  | 3'  | +      | 10554221   | 119      | Intron                       | NM_001243121 | PDE4A        | +      | 10527448  | 10580307  |
| Patient PBMC 02/04 | chr19                | 14599936  | 3'  | +      | 14600024   | 88       | exon                         | NM_001148693 | LOC100130932 | +      | 14599757  | 14600690  |
| Patient PBMC 02/04 | chr19                | 39094745  | 3'  | +      | 39094883   | 138      | Intron                       | NM_007161    | MAP4K1       | -      | 39078280  | 39108643  |
| Patient PBMC 02/04 | chr19                | 48749292  | 3'  | +      | 48749432   | 140      | Intron                       | NM_014959    | CARD8        | -      | 48711342  | 48759203  |
| Patient PBMC 02/04 | chr19                | 51912805  | 3'  | +      | 51912977   | 172      | 469                          | NM_001171160 | SIGLEC10     | -      | 51913274  | 51921057  |
| Patient PBMC 02/04 | chr19                | 58267510  | 3'  | +      | 58267657   | 147      | exon                         | NM_173632    | ZNF776       | +      | 58258163  | 58269527  |
| Patient PBMC 02/04 | chr2                 | 64433833  | 3'  | +      | 64433901   | 68       | 1214                         | NR_033837    | NCRNA00309   | -      | 64412212  | 64432619  |
| Patient PBMC 02/04 | chr2                 | 64433833  | 3'  | +      | 64433995   | 62       | 1214                         | NR_033837    | NCRNA00309   | -      | 64412212  | 64432619  |
| Patient PBMC 02/04 | chr22                | 21196634  | 3'  | +      | 21196794   | 160      | Intron                       | NM_002650    | PI4KA        | -      | 21061978  | 21213070  |
| Patient PBMC 02/04 | chr22                | 30312710  | 3'  | -      | 30312612   | 98       | Intron                       | NM_021090    | MTMR3        | +      | 30279157  | 30426857  |
| Patient PBMC 02/04 | chr3                 | 14229514  | 3'  | +      | 14229608   | 94       | Intron                       | NM_014463    | LSM3         | +      | 14220227  | 14239869  |
| Patient PBMC 02/04 | chr4                 | 39411125  | 3'  | +      | 39411204   | 79       | Intron                       | NM_175737    | KLB          | +      | 39408472  | 39453153  |
| Patient PBMC 02/04 | chr4                 | 147393213 | 3'  | +      | 147393517  | 304      | Intron                       | NM_001029998 | SLC10A7      | -      | 147175136 | 147443123 |
| Patient PBMC 02/04 | chr4                 | 147393213 | 3'  | +      | 147393298  | 85       | Intron                       | NM_001029998 | SLC10A7      | -      | 147175136 | 147443123 |
| Patient PBMC 02/04 | chr5                 | 102500747 | 3'  | -      | 102500492  | 255      | Intron                       | NM_015216    | PPIP5K2      | +      | 102465256 | 102538909 |
| Patient PBMC 02/04 | chr6                 | 37920272  | 3'  | -      | 37920235   | 37       | Intron                       | NM_021943    | ZFAND3       | +      | 37787306  | 38122399  |
| Patient PBMC 02/04 | chr6                 | 131163368 | 3'  | -      | 131163230  | 138      | Intron                       | NM_001431    | EPB41L2      | -      | 131160487 | 131291623 |
| Patient PBMC 02/04 | chr6                 | 139270272 | 3'  | -      | 139269828  | 444      | Intron                       | NM_031922    | REPS1        | -      | 139225619 | 139309398 |
| Patient PBMC 02/04 | chr7                 | 79160797  | 3'  | -      | 79160768   | 29       | 80273                        | NR_038345    | LOC100505881 | +      | 79082272  | 79100524  |
| Patient PBMC 02/04 | chr7                 | 98967688  | 3'  | -      | 98967580   | 108      | 3803                         | NM_006409    | ARPC1A       | +      | 98923495  | 98963885  |
| Patient PBMC 02/04 | chr7                 | 129586454 | 3'  | +      | 129586608  | 154      | Intron                       | NM_001202498 | UBE2H        | -      | 129470572 | 129592900 |
| Patient PBMC 02/04 | chr7                 | 139756502 | 3'  | +      | 139756551  | 49       | Intron                       | NM_022750    | PARP12       | -      | 139723548 | 139763521 |
| Patient PBMC 02/04 | chr7                 | 139756502 | 3'  | +      | 139756545  | 43       | Intron                       | NM_022750    | PARP12       | -      | 139723548 | 139763521 |
| Patient PBMC 02/04 | chr9                 | 97545951  | 3'  | +      | 97545973   | 22       | Intron                       | NM_032823    | C9orf3       | +      | 97488950  | 97849500  |
| Patient PBMC 02/04 | chr9                 | 110250443 | 3'  | +      | 110250477  | 34       | exon                         | NM_004235    | KLF4         | -      | 110247132 | 110252047 |
| Patient PBMC 02/04 | chr9                 | 130827432 | 3'  | -      | 130827348  | 84       | Intron                       | NM_197956    | NAIF1        | -      | 130823511 | 130829599 |
| Patient PBMC 02/04 | chr9                 | 131244483 | 3'  | +      | 131244582  | 99       | Intron                       | NM_153436    | ODF2         | +      | 131217433 | 131257119 |

(a) Source and date (month/year) of sample

(b) Note that 5' and 3' LTRs at the same site differ by 5 bases

(c) from hg19

(d) If not in gene, shows distance to the nearest gene

(e) Unknown. These sequences could not be mapped because they were present multiple times in the genome highlight denotes AMBI-1 integrant.
